# Supplementary material for: Brown Spider Venom Phospholipase-D Activity upon Different Lipid Substrates
Source: MDPI journal article supplement (doi:10.3390/toxins15020109), 2023-01-27
Supplement: s1 [file s1]

## Supplementary Materials

### Brown Spider Venom Phospholipase-D Activity upon Different Lipid Substrates

Daniele Chaves-Moreira <sup>1</sup>, Luiza Helena Gremski <sup>1</sup>, Fábio Rogério de Moraes <sup>2</sup>, Larissa Vuitika <sup>1</sup>,  
Ana Carolina Martins Wille <sup>3</sup>, Jorge Enrique Hernández González <sup>2</sup>, Olga Meiri Chaim <sup>1</sup>,  
Andrea Senff-Ribeiro <sup>1</sup>, Raghuvir Krishnaswamy Arni <sup>2</sup> and Silvio Sanches Veiga <sup>1,\*</sup>

<sup>1</sup> Department of Cell Biology, Federal University of Paraná (UFPR), Curitiba 81531-980, Brazil;

<sup>2</sup> Department of Physics, Multi-user Center for Biomolecular Innovation, State University of São Paulo (UNESP), São Paulo 05315-970, Brazil

<sup>3</sup> Department of Structural and Molecular Biology, State University of Ponta Grossa (UEPG), Ponta Grossa 84030-900, Brazil

\* Correspondence: veigass@ufpr.br; Tel.: +55-41-3361-1776

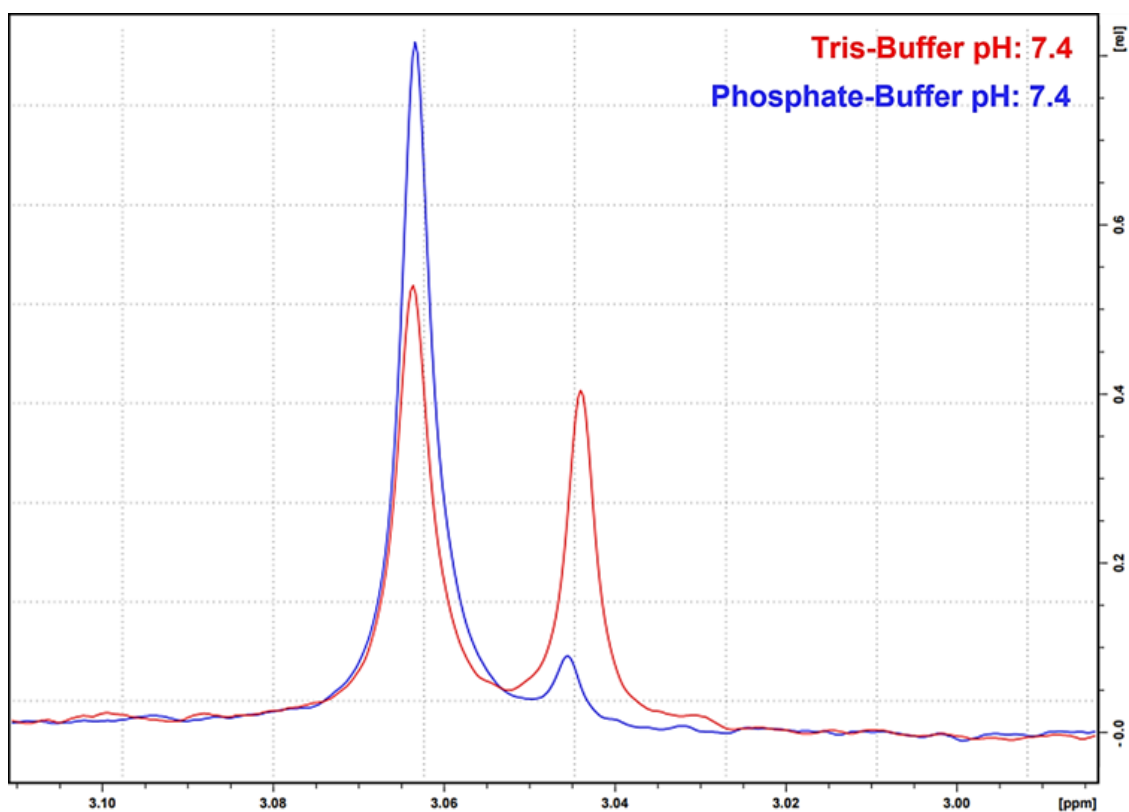

**Figure S1.** One dimensional <sup>1</sup>H-NMR spectra of -CH<sub>2</sub>- resonance of buffers used in NMR spectroscopy experiments whose results are shown in Figures S2 and S3.

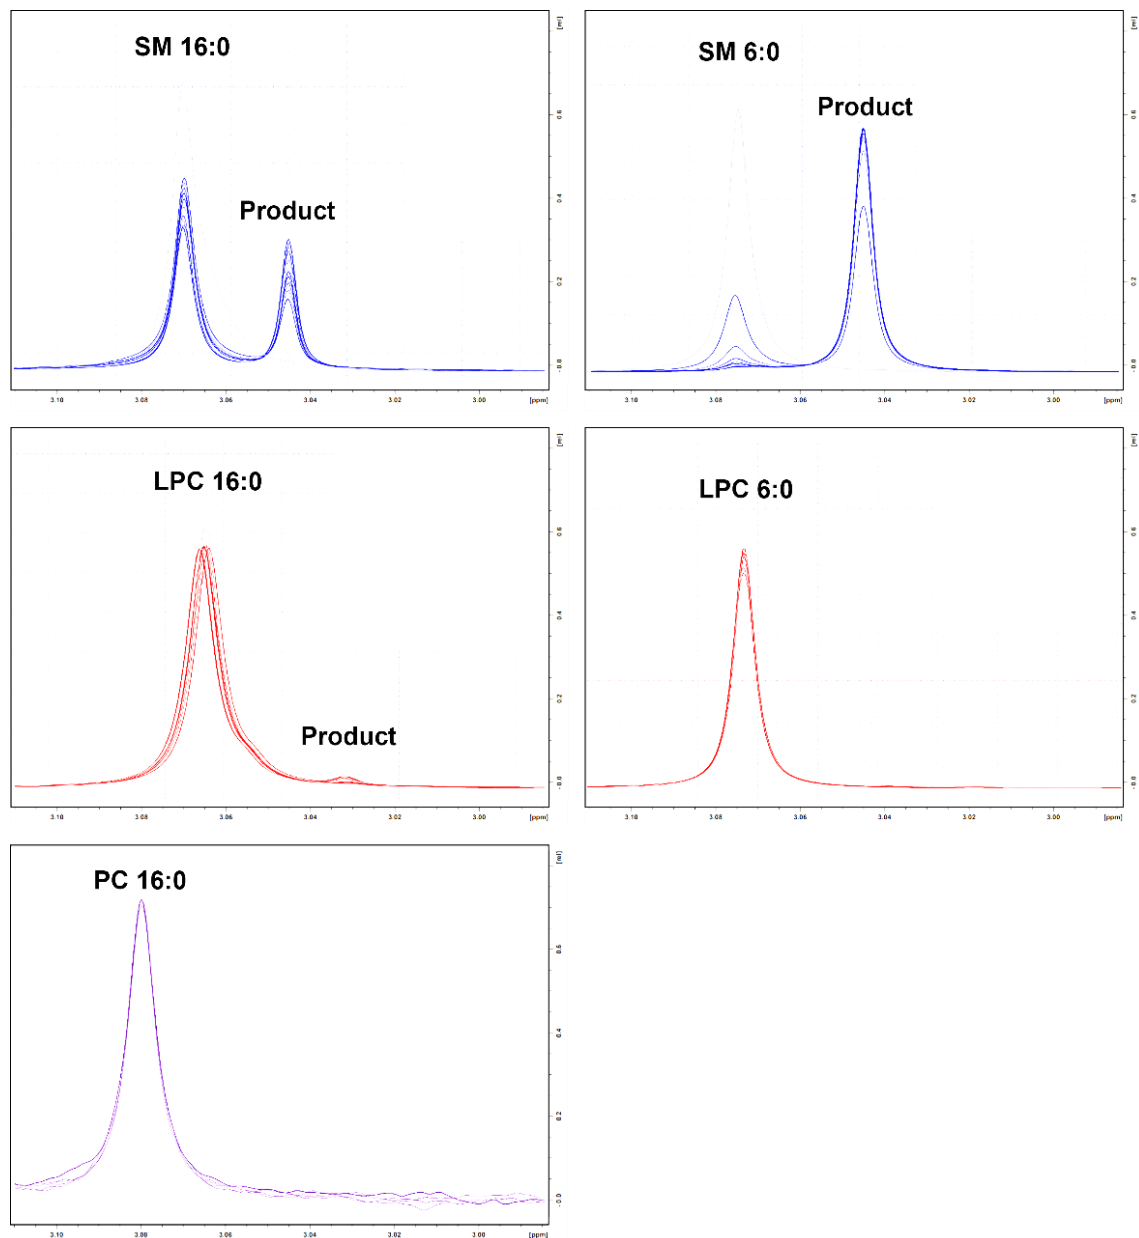

**Figure S2.** Analysis of the cleavage activity of Brown spider recombinant phospholipase-D (LiRecDT1) on different phospholipid substrates, studied by using NMR spectroscopy. A) One dimensional  $^1\text{H}$ -NMR spectra of  $-\text{CH}_2-$  resonance of SM 16:0, SM 6:0, LPC 16:0, LPC 6:0 and PC 16:0 monitored along a 2-hour period after recombinant phospholipase-D treatment.

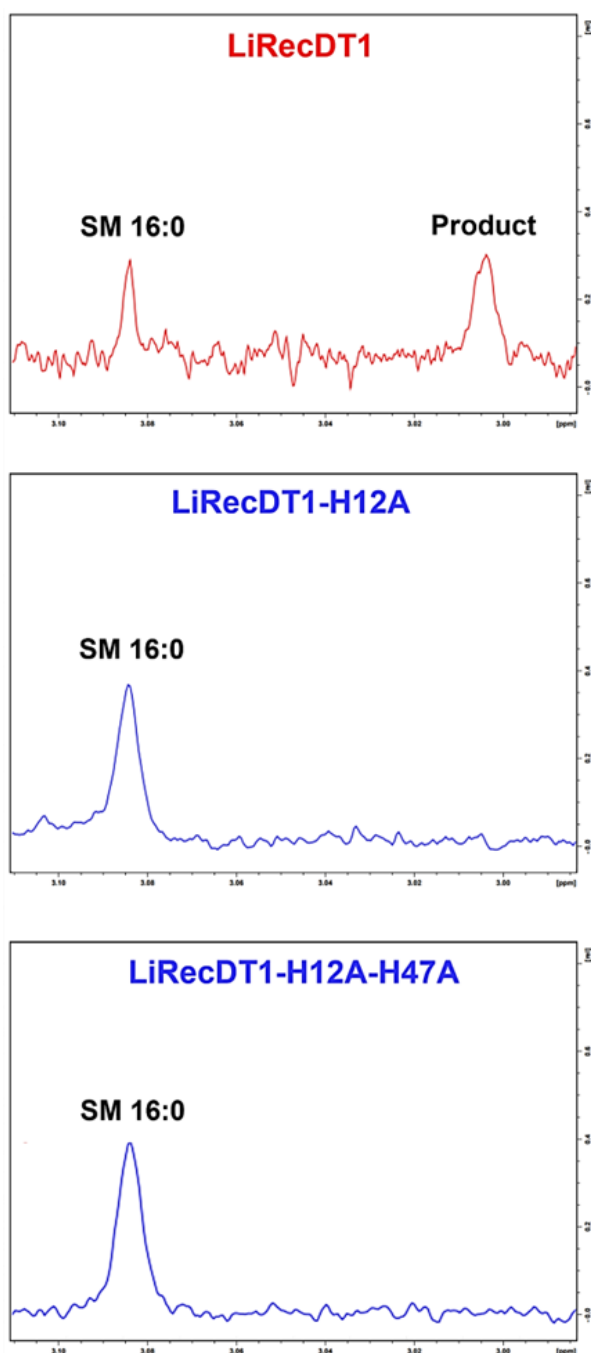

**Figure S3.** Analysis of the cleavage activity of Brown spider recombinant wild-type or mutated phospholipases-D on SM 16:0, studied by using NMR spectroscopy. A) One dimensional <sup>1</sup>H-NMR spectra of -CH<sub>2</sub>- resonance of SM 16:0 incubated with LiRecDT1 (wild-type), LiRecDT1-H12A and LiRecDT1-H12A-H47A (mutations in amino acid residues of catalytic site) monitored along a 2-hour period after recombinant phospholipase-D treatment.

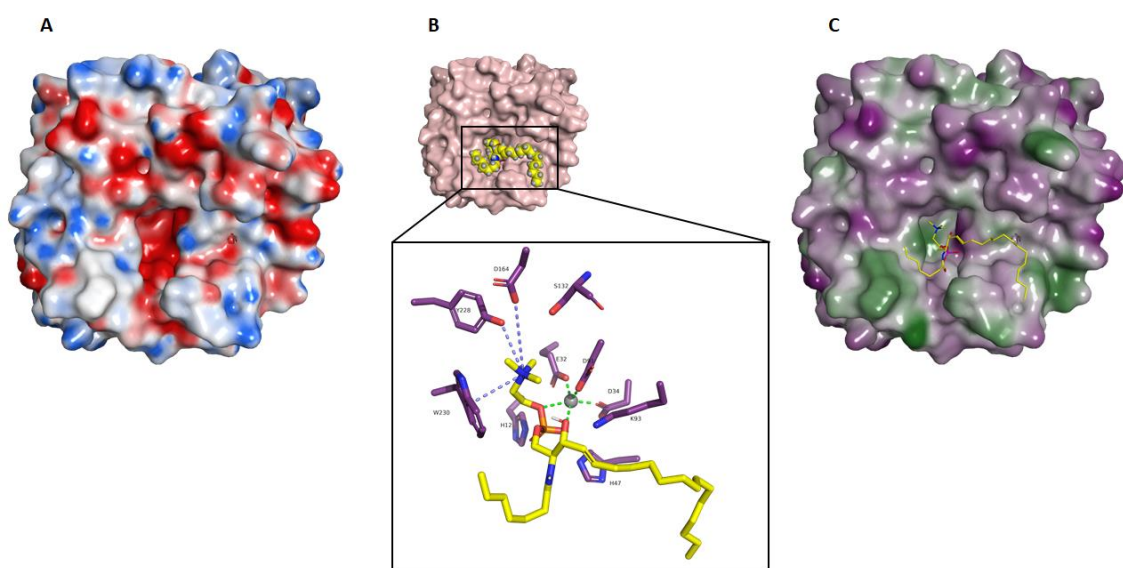

**Figure S4.** Structural analysis of brown spider recombinant phospholipase-D with sphingomyelin SM 06:0. **(A)** Molecular surface with electrostatics determined by Poisson-Boltzmann method showing deep electronegative substrate binding cleft of *L. intermedia* PLD. Electrostatic color map range from -40 (red) to +40 (blue). **(B)** Molecular surface representation of *L. intermedia* PLD with **SM 06:0** (d18:1/06:0) docked substrate shown as solid space-filled spheres (yellow) and close-up view of the docked pose. **(C)** Molecular surface of *L. intermedia* PLD docked with **SM 06:0** (d18:1/06:0) substrate colored by hydrophobicity (green) and hydrophilicity (purple).
